# Supplementary material for: A Single-Central, Randomized, Double-Blinded, Placebo-Controlled, Crossover Trial Protocol: A Clinical Effect Evaluation Study on the TCM Comprehensive Intervention Program for Chronic Heart Failure
Source: Evid Based Complement Alternat Med. 2021 Dec 28;2021:4577139. doi: 10.1155/2021/4577139 (PMC11401715; doi:10.1155/2021/4577139)
Supplement: Supplementary Materials — Additional file 1: Completed Standard Protocol Items: Recommendation for Interventional Trials (SPIRIT) 2013 Checklist: items addressed in this clinical trial protocol. Additional file 2: informed consent form. [file 4577139.f1.zip]

Archive with 2 entries (2 files):
- 4577139.f1/Additional file 1.doc
- 4577139.f1/Additional file 2.docx
